# Supplementary material
Source: HighWire-hosted journal article supplement (https://bmjopenquality.bmj.com/content/8/4/e000626)

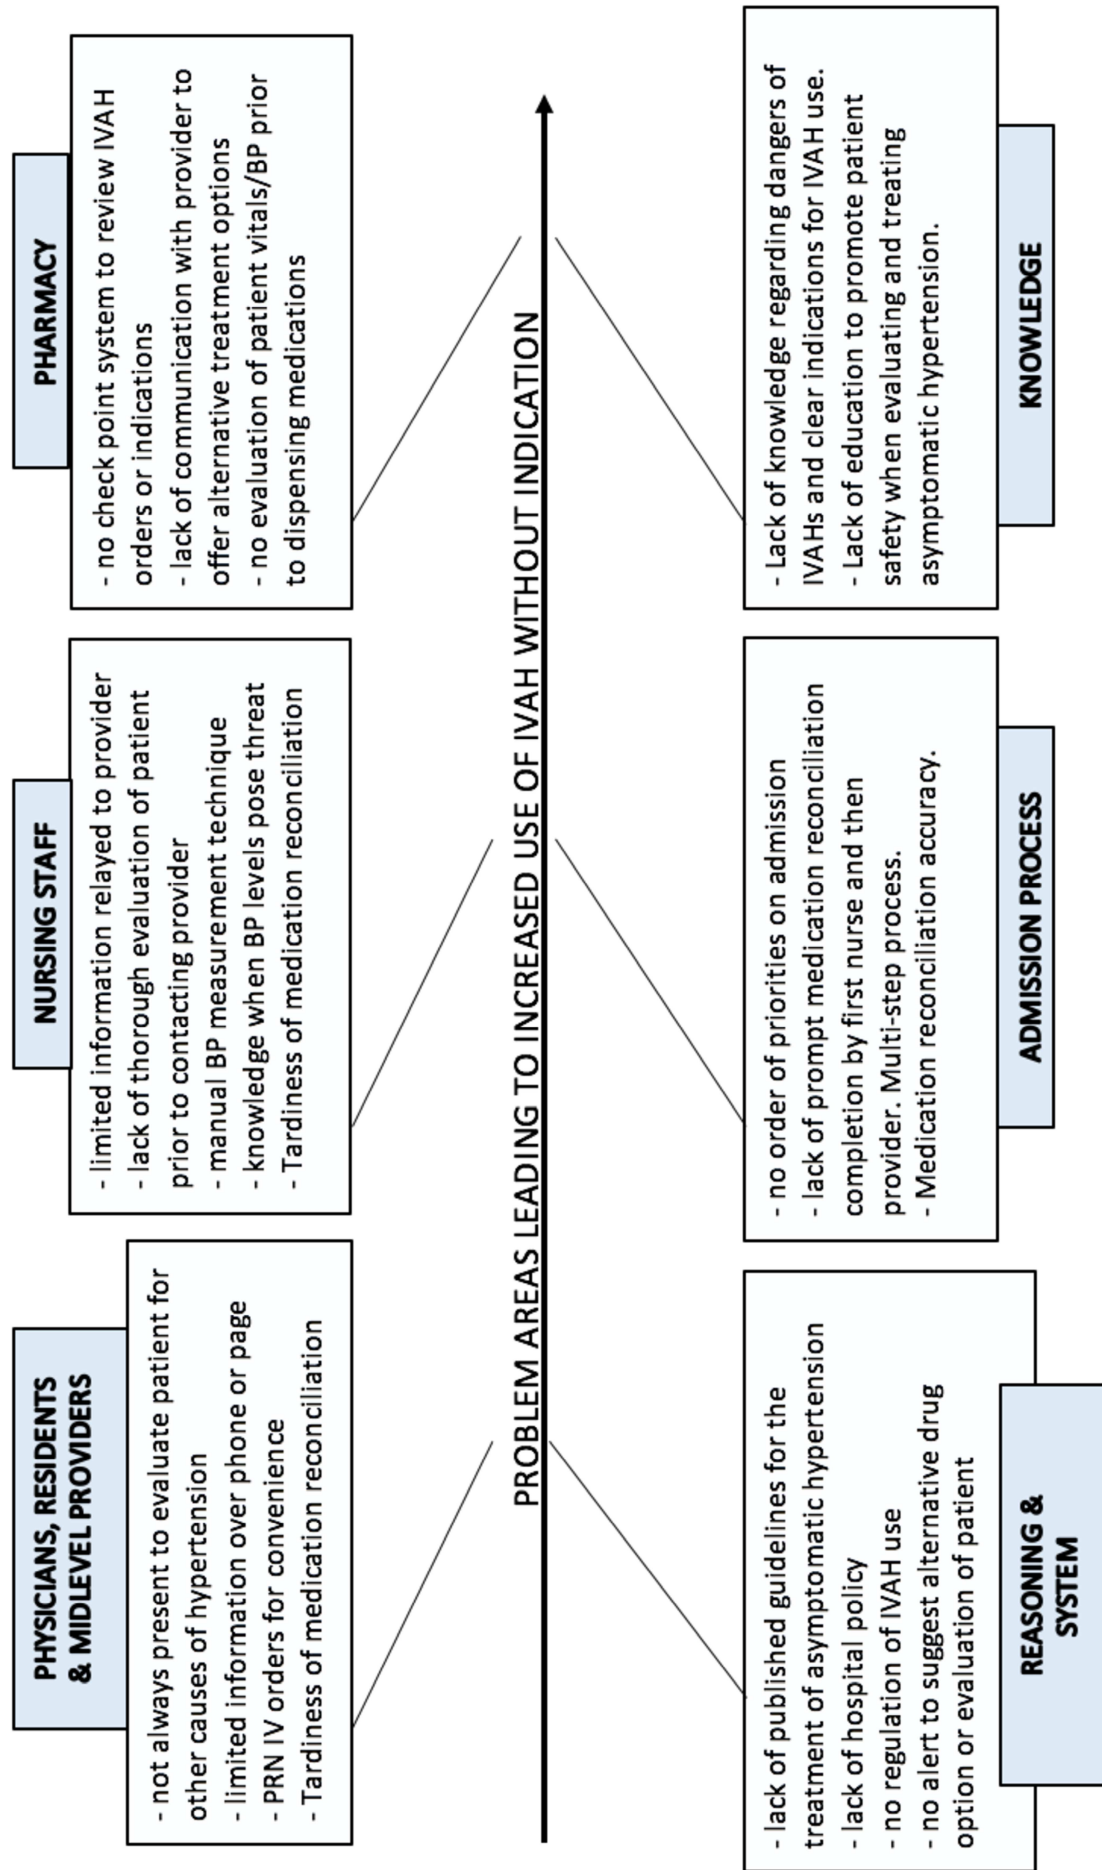

Supplement: inline-supplementary-material-1 [file inline-supplementary-material-1.pdf]

FIGURE 4

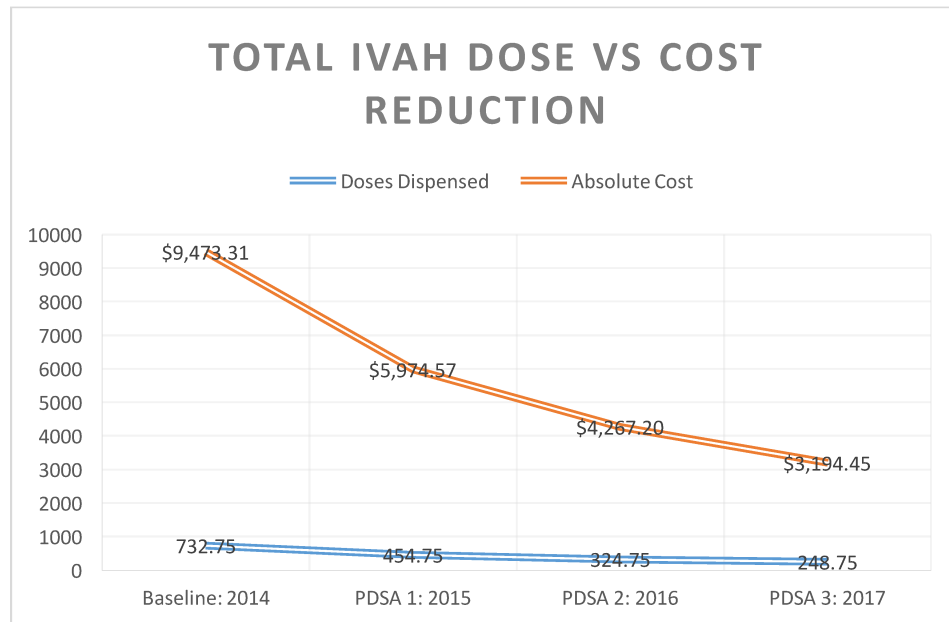

Supplement: inline-supplementary-material-3 [file inline-supplementary-material-3.pdf]

FIGURE 5

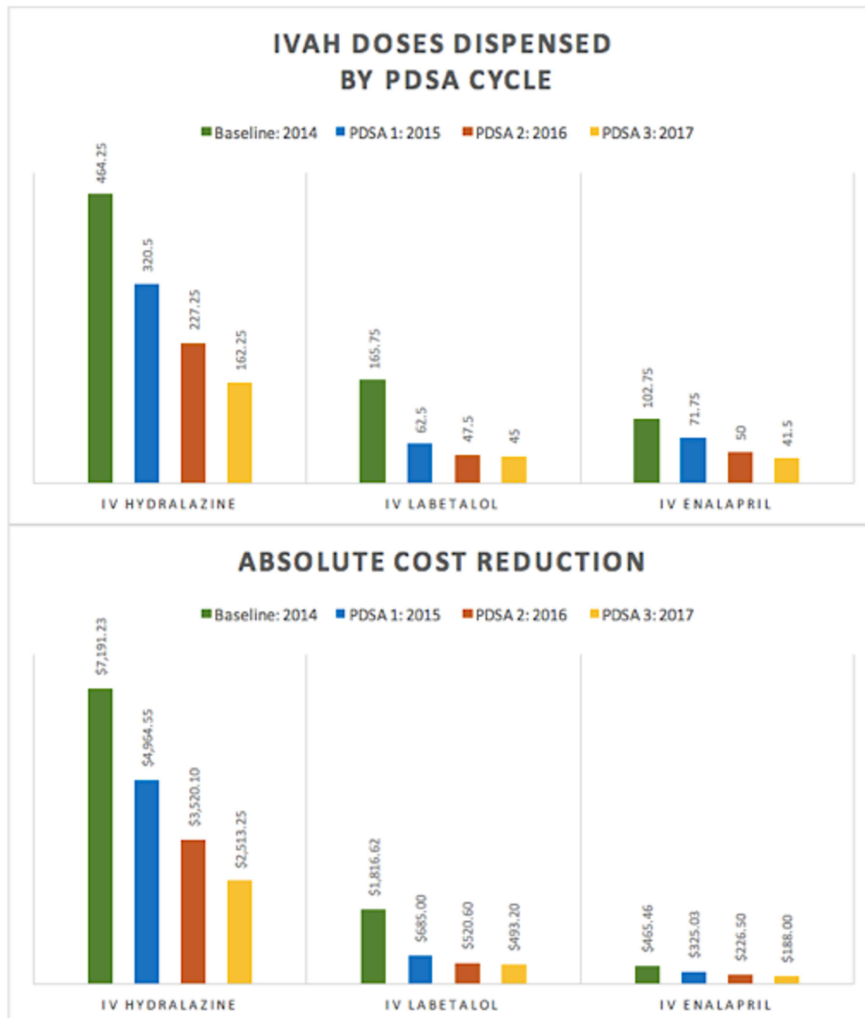

Supplement: inline-supplementary-material-5 [file inline-supplementary-material-5.pdf]
